# Supplementary material for: Factors influencing suicide risk assessment clinical practice: protocol for a scoping review
Source: PubMed Central journal article supplement — BMJ Open. 2019 Feb 18;9(2):e026566. doi: 10.1136/bmjopen-2018-026566 (PMC6398626; doi:10.1136/bmjopen-2018-026566), 2019-02-18
Supplement: bmjopen-2018-026566.draft_revisions.pdf [file bmjopen-2018-026566.draft_revisions.pdf]

# BMJ Open

BMJ Open is committed to open peer review. As part of this commitment we make the peer review history of every article we publish publicly available.

When an article is published we post the peer reviewers' comments and the authors' responses online. We also post the versions of the paper that were used during peer review. These are the versions that the peer review comments apply to.

The versions of the paper that follow are the versions that were submitted during the peer review process. They are not the versions of record or the final published versions. They should not be cited or distributed as the published version of this manuscript.

BMJ Open is an open access journal and the full, final, typeset and author-corrected version of record of the manuscript is available on our site with no access controls, subscription charges or pay-per-view fees (<http://bmjopen.bmj.com>).

If you have any questions on BMJ Open's open peer review process please email [info.bmjopen@bmj.com](mailto:info.bmjopen@bmj.com)

# BMJ Open

## Factors influencing suicide risk assessment clinical practice: protocol for a scoping review

|                               |                                                                                                                                                                                                                                                                                                                                                                                                                                                                                   |
|-------------------------------|-----------------------------------------------------------------------------------------------------------------------------------------------------------------------------------------------------------------------------------------------------------------------------------------------------------------------------------------------------------------------------------------------------------------------------------------------------------------------------------|
| Journal:                      | <i>BMJ Open</i>                                                                                                                                                                                                                                                                                                                                                                                                                                                                   |
| Manuscript ID                 | bmjopen-2018-026566                                                                                                                                                                                                                                                                                                                                                                                                                                                               |
| Article Type:                 | Protocol                                                                                                                                                                                                                                                                                                                                                                                                                                                                          |
| Date Submitted by the Author: | 08-Sep-2018                                                                                                                                                                                                                                                                                                                                                                                                                                                                       |
| Complete List of Authors:     | Sequeira, Lydia; University of Toronto Institute of Health Policy Management and Evaluation; Centre for Addiction and Mental Health, Information Management Group<br>Strudwick, Gillian; Centre for Addiction and Mental Health, Information Management Group<br>Bailey, Sharon; Centre for Addiction and Mental Health - Russell Street Site, Library<br>De Luca, Vincenzo; Centre for Addiction and Mental Health<br>Wiljer, David; University Health Network,<br>Strauss, John |
| Keywords:                     | suicide, risk assessment, clinical decision making, organizational factors, cognitive bias                                                                                                                                                                                                                                                                                                                                                                                        |
|                               |                                                                                                                                                                                                                                                                                                                                                                                                                                                                                   |

SCHOLARONE™  
Manuscripts

1  
2  
3 **Title:** Factors influencing suicide risk assessment clinical practice: protocol for a scoping review  
4  
5

6 **Authors:** Lydia Sequeira, MHI,<sup>1,2</sup> Gillian Strudwick, PhD, RN,<sup>1,2</sup> Sharon M. Bailey, MI<sup>2</sup>  
7 Vincenzo De Luca, MD,<sup>2,3</sup> David Wiljer, PhD,<sup>1-4</sup> John Strauss, MD<sup>1-3</sup>  
8  
9

10  
11 **Authors' affiliations:**  
12

- 13 1. Institute of Health Policy, Management and Evaluation (IHPME), Dalla Lana School of  
14 Public Health, University of Toronto, Toronto, Ontario, Canada
- 15 2. Centre for Addiction and Mental Health (CAMH), Toronto, Ontario, Canada
- 16 3. Faculty of Medicine, Department of Psychiatry, University of Toronto, Toronto, Ontario,  
17 Canada
- 18 4. UHN Digital, University Health Network (UHN), Toronto, Ontario, Canada  
19  
20

21  
22 **Correspondence to:** Lydia Sequeira, MHI  
23 7153, 100 Stokes St., Toronto, Ontario, Canada M6J 1H4  
24 Phone: 416 535-8501 x 33575  
25 Email: lydia.sequeira@mail.utoronto.ca  
26  
27  
28  
29

30 **Word Count:** 2,309  
31  
32  
33  
34  
35  
36  
37  
38  
39  
40  
41  
42  
43  
44  
45  
46  
47  
48  
49  
50  
51  
52  
53  
54  
55  
56  
57  
58  
59  
60

## ABSTRACT

### Introduction

Every year, suicide accounts for nearly 800,000 deaths worldwide. Appropriate risk assessment and intervention is imperative since evidence demonstrates that a large proportion of those who die by suicide visit health professionals prior to their death. Much previous research has focused on identifying patient level risk factors that can improve the risk assessment process through risk scales and algorithms. However, clinical guidelines emphasize the importance of evaluation through clinical interviews and prioritize the clinician's final judgment. The purpose of this review is to (1) understand the clinician and organizational level barriers and facilitators that influence a clinician's assessment of suicide risk, (2) identify the types of biases that exist within the risk assessment process, and (3) determine if there are evidence-based training protocols and educational initiatives to aid (or support) clinicians with this process.

### Methods and analysis

This scoping review protocol uses the Arksey and O'Malley framework. Literature will be identified using a multi-database search strategy developed in consultation with a medical librarian. The proposed screening process consists of a title and abstract scan, followed by a full-text review to determine the eligibility of articles. Studies outlining any factors that affect a clinician's suicide risk assessment process, ranging from individual experience and behaviours to organizational level influences will be included. Results of the search will be screened independently by two reviewers and included studies will be abstracted and charted. A descriptive analysis of the extracted data will be identified within the results using the Situated Clinical Decision Making framework to organize the themes.

### Ethics and dissemination

Ethical approval is not required for this review. The results will be translated into educational materials and presentations for dissemination to appropriate knowledge users. Knowledge outputs will also include academic presentations at relevant national and informational conferences, and a published, peer-reviewed journal article.

### Keywords

Suicide, risk assessment, clinical decision making, organizational factors, cognitive bias

## STRENGTHS AND LIMITATIONS OF THIS STUDY

- Findings from this review will aid in providing a catalogue of broader, non-patient related factors that affect the suicide risk assessment process.
- Strengths of this study include the importance of the topic to the suicide risk assessment process, use of an established scoping review methodology, a rigorous search strategy developed by a medical librarian, and a systematic study selection and data extraction process carried out by two health service researchers.
- Limitations include the restriction to English language studies and the potential to miss relevant studies in the grey literature.
- Consultation with content experts will be included to mitigate some of the limitations.

## INTRODUCTION

Every year, close to 800,000 individuals die by suicide around the world.<sup>1</sup> Among these, research from the United States has shown that around 45% of individuals have visited mental health and primary care providers in the month prior to their death.<sup>2</sup> Therefore, targeting healthcare providers for appropriate suicide risk assessment and intervention is imperative. Assessing and managing suicide risk is considered a core competency of mental health care. This process of risk assessment and management for suicide is best understood as structured evaluation, intervention and subsequent re-assessment of a patient's likelihood to attempt suicide.<sup>3</sup>

Risk assessment falls within the scope of decision making, of which there are largely two classes – clinical judgement (or clinical decision making), which refers to a clinician's expert opinion based on their data gathering, and mechanical prediction, which refers to purely statistical and algorithmic prediction. A previous meta-analysis of 136 studies of human health and behaviour demonstrated that mechanical prediction was consistently more accurate than clinical judgement.<sup>4</sup> With large public concern surrounding deaths by suicide, much research over the past 50 years within this field has focused on identifying patient risk factors<sup>5</sup> and developing risk assessment tools to better recognize patients at highest risk of committing suicide, including the Beck Hopelessness Scale<sup>6</sup>, Columbia-Suicide Severity Rating Scale<sup>7</sup>, Nurses' Global Assessment of Suicide Risk<sup>8</sup> and SAD PERSONS<sup>9</sup>, among others. Unfortunately, there has been limited supporting evidence for the use of risk scores from these tools as the sole basis for decision making since the predictive ability of these tools are rather low, given a low overall prevalence of suicides in the general population (0.01%).<sup>10</sup>

Additionally, the advent of electronic health records has led to an increase in the amount and variety of patient data that can be extracted and analyzed, which in turn has more recently given rise to complex algorithms attempting to predict suicide or suicidal behaviour, including ones that have achieved sensitivities ranging from 0.33-0.45<sup>11</sup> to 0.70<sup>12</sup>, 0.72<sup>13</sup> and even 0.95.<sup>14</sup> Moving such algorithms into practice has proven to be an issue, since practical challenges exist such as validating an algorithm in a different population, gaining clinician trust in the algorithm, implementation into the clinical work flow, and ensuring ongoing data quality assurance.<sup>15</sup> As a result, such suicide predictive algorithms have stayed within the realm of research and have not been assessed prospectively within clinical practice.

Despite all this relevant research, there is currently no universally defined pathway or algorithm for accurately integrating risk factors for suicide, leading to the use of risk tools and algorithms more as an aid to clinical decision making, to uncover pertinent information.<sup>10</sup> World Health Organization (WHO) guidelines suggest that suicide risk should be specifically evaluated with clinical interviews assessing psychological and social functioning of the patient.<sup>16 17</sup> Other clinical guidelines on suicide risk assessment similarly emphasize the importance of the clinician's final judgment<sup>18</sup>. Given the challenges in behaviour prediction, a state-of-the-art review on the topic has prompted the need for understanding what constitutes a reasonable standard of care in suicide risk assessment.<sup>19</sup>

1  
2  
3 There are a multiplicity of concerns complicating the clinical management of suicide risk, and  
4 despite the increasing focus on targeting risk assessment and prevention interventions at high  
5 risk patients, little is known about the contextual, non-patient specific factors that influence a  
6 clinician's decision making process while conducting a suicide risk assessment. Clinical  
7 experience, a thorough knowledge base and the ability to think critically, are a few of the many  
8 skills required for any clinical decision making process.<sup>20</sup> Theories on decision making based on  
9 human thought processes have suggested a dual decision making theory wherein clinicians use  
10 both intuitive and analytical processes.<sup>21</sup> Intuitive decisions are fast and abbreviated, making  
11 uses of heuristics and shortcuts for familiar scenarios. Occasionally, this use of shortcuts can lead  
12 to over confidence and complacency, predisposing the clinician to biased decisions.<sup>22</sup> It is  
13 important to understand how clinicians' cognitive factors such as intuition and experience  
14 contribute to their risk formulation process and confidence in their decision. An important  
15 starting line for educational and training purposes is to identify the variety of clinical experiences  
16 that exist within the practice of suicide risk assessment<sup>23</sup>, and to understand the barriers and  
17 facilitators for consistent clinical practice.  
18  
19  
20  
21  
22

23 This paper outlines a protocol for a scoping review focused on shifting the spotlight onto finding  
24 clinician and organizational level characteristics that can influence the suicide risk assessment  
25 process, highlighting that mental health professionals are not free of biases, some of which can  
26 unsuspectingly affect their decisions.<sup>24 25</sup> The primary purpose is to understand how factors  
27 other than patient-level ones, affect the clinical decision making process, which will in turn help  
28 inform the development and adoption of best practice risk assessment and clinical decision  
29 making around suicide and suicidal behaviour.<sup>26</sup> The findings from this review will allow us to  
30 explore the broad topic of suicide risk assessment and increase awareness of these factors.  
31 Increased awareness of these elements can eventually lead to more efficient practice.  
32  
33  
34  
35

### 36 **Methods and analysis**

37 The scoping review is a rigorous and systematic method for mapping key concepts, research  
38 areas and gaps in knowledge, especially in an area that has not been comprehensively reviewed  
39 before<sup>27</sup>. One of its main strengths include presenting the results in an accessible format for  
40 knowledge users.  
41

42 This review follows the seminal framework outlined by Arksey and O'Malley<sup>28</sup>, and advanced by  
43 Levac *et al.*<sup>29</sup>. Arksey and O'Malley propose a six step framework for carrying out a scoping  
44 review, including: (1) identifying the research question, (2) identifying relevant literature, (3)  
45 study selection, (4) charting the data, (5) collating, summarizing and reporting the articles and  
46 (6) consulting and translating knowledge<sup>28</sup>. In order to ensure relevance to patient care, our study  
47 team also includes knowledge users. This protocol uses the recently developed 20 item Preferred  
48 reporting items for systematic reviews and meta-analysis extension for Scoping Reviews  
49 (PRISMA- ScR)<sup>30</sup> to ensure appropriate rigor.  
50  
51

52 Detailed further below are the various steps involved within the Arksey and O'Malley process, as  
53 applied to this scoping review:  
54  
55

#### 56 **1. Identifying the research question**

The aim of this scoping review is to identify the personal, professional and organizational level barriers and facilitators that influence the suicide risk assessment process carried out by a clinician. To meet these aims, this review seeks to answer the following questions:

1. What non-patient specific factors affect the suicide risk assessment process?
2. What types of inherent clinician biases can exist within this process?
3. Is there evidence of training and educational initiatives that have helped clinicians improve upon these contextual factors?

## 2. Identifying relevant studies

The comprehensive search strategy was iteratively developed in consultation with a medical librarian (SB), and was validated through the retrieval of a key set of relevant studies. To ensure a comprehensive search of the health sciences literature, we used the following primary electronic databases: MEDLINE, PsycINFO, Embase, CINAHL, and ERIC. The search query was first developed in MEDLINE, using the Ovid interface which allows for fine-tuning using Medical Subject Headings (MeSH) indexed by the National Library of Medicine's controlled vocabulary.<sup>31</sup> The Ovid interface also allows for a more accurate translation of the search strategy to query other Ovid-based databases such as PsycINFO and Embase.

The search strategy consisted of subject headings, keywords and related terms for the concepts of suicide risk assessment and experiences of health personnel relating to this behaviour. Terms for the concept of suicide risk assessment included "risk assessment" combined with "suicide", "suicidal ideation" or "suicide attempt". The primary search terms for the concept of clinician's experiences included "attitude of health personnel", "knowledge, attitudes and practice" and "physician-patient relations". A detailed search strategy can be found in Table 1.

Our search is limited to the English journal articles, without date or study type restrictions. All bibliographic results from the search were stored using the citation management program EndNote [<http://endnote.com/>]. The citations were also downloaded into a spreadsheet for screening and charting purposes.

Table 1: Search Strategy for OVID Medline

|   |                                                                                                                                                                                                                                                                                                                                                                                                                                                                                                                                                                       |
|---|-----------------------------------------------------------------------------------------------------------------------------------------------------------------------------------------------------------------------------------------------------------------------------------------------------------------------------------------------------------------------------------------------------------------------------------------------------------------------------------------------------------------------------------------------------------------------|
| 1 | Risk Assessment/ or "Healthcare Failure Mode and Effect Analysis"/ or (risk* adj4 assess*).ti,ab,kf.                                                                                                                                                                                                                                                                                                                                                                                                                                                                  |
| 2 | Suicide/ or Suicidal Ideation/ or Suicide, Attempted/ or suicid*.ti,ab,kf.                                                                                                                                                                                                                                                                                                                                                                                                                                                                                            |
| 3 | "Attitude of Health Personnel"/ or Practice Patterns, Physicians'/ or Bias/ or Observer Variation/ or exp Prejudice/ or Culturally Competent Care/ or Alert Fatigue, Health Personnel/ or Physician-Patient Relations/ or Professional-Patient Relations/ or Nurse-Patient Relations/ or Nonverbal Communication/ or Health Knowledge, Attitudes, Practice/ or Clinical Competence/ or Clinical Decision-Making/ or Clinical Protocols/ or Duty to Warn/ or Clinical Decision-Making/ or Ethics, Medical/ or Professional Role/ or Nurse's Role/ or Physician's Role/ |



|   |                                                                                                                                                                                                                      |
|---|----------------------------------------------------------------------------------------------------------------------------------------------------------------------------------------------------------------------|
| 4 | Inservice Training/ or Simulation Training/ or Staff Development/ or Education, Continuing/ or Education, Nursing, Continuing/ or Education, Medical, Continuing/ or "Internship and Residency"/ or Teaching Rounds/ |
| 5 | exp Health Occupations/ or exp Health Personnel/ or (clinician* or "health care professional*" or "healthcare professional*").ti,ab,kf.                                                                              |
| 6 | or/3-5                                                                                                                                                                                                               |
| 7 | and/1-2,6                                                                                                                                                                                                            |
| 8 | limit 7 to english language                                                                                                                                                                                          |

Table 1 Legend

| Code | Description                                                                                                                |
|------|----------------------------------------------------------------------------------------------------------------------------|
| /    | indicates that a term is a subject heading                                                                                 |
| adj4 | searches within 4 words of each other (4 words before and 4 words after) in either direction                               |
| *    | truncation technique to broaden search to include words with different endings and spellings                               |
| ti   | searches field that contains the English language version of a title                                                       |
| ab   | searches author-written abstracts                                                                                          |
| kf   | retrieves every keyword heading that includes the particular word                                                          |
| exp  | indicates that a subject heading is "exploded" to include all of the narrower subject headings beneath it in the hierarchy |

### 3. Study Selection

After a combined pilot with both reviewers, to ensure common understanding of the inclusion criteria, all articles will be independently screened in two stages. Study eligibility will be determined beginning with a title and abstract scan, followed by a full-text review stage.

In order to be eligible, studies must involve the following criteria: (i) study the risk screening or assessment process around suicide (ii) include clinicians' thinking, attitudes, or experiences, and (iii) apply to patients being assessed within primary care, EDs, or mental health and addiction outpatient or inpatient settings. We will include published literature reporting on previous literature reviews, quantitative, qualitative, mixed or multi-methods research. Exclusions will include articles primarily detailing the assessment of risk of Deliberate Self Harm (DSH) or Non-Suicidal Self Injury (NSSI). This is because DSH and NSSI differs from suicidal behaviours in intent, level of lethality, level of psychological pain and cognitive constriction. In general, DSH and NSSI are behavior undertaken to feel better or cope, whereas suicide-related behaviors are undertaken to end the capacity to feel at all by ending one's life.<sup>32</sup>

Ratings will be documented on the spreadsheet as 'include', 'exclude' or 'uncertain', and at the end of each round, ratings will be compared and resolved by the pair through discussion and consensus, with a third reviewer in case of no further resolution. All reviewers will use a pilot-tested screening form developed for this review, including the 3 main criteria listed above. The

inter-rater reliability will be calculated, with a Cohen's Kappa threshold of greater than or equal to 0.70, indicating substantial agreement.<sup>33</sup>

#### 4. Charting the data

Charting data involves organising and interpreting data by sifting and sorting through material according to key issues and themes<sup>28</sup>. Included studies will be reviewed and charted independently by the two reviewers, using a standardized charting form consisting of the following data, where available:

Table 2: Charting details

|                                                                                                                                                                                                                                                                                                                                                                                                                                                                                                                                                                                                                                                                                                                                                                                                                                                                                                                                                                                                                                                                                                                                                                                                                                                                                                                                                                                 |
|---------------------------------------------------------------------------------------------------------------------------------------------------------------------------------------------------------------------------------------------------------------------------------------------------------------------------------------------------------------------------------------------------------------------------------------------------------------------------------------------------------------------------------------------------------------------------------------------------------------------------------------------------------------------------------------------------------------------------------------------------------------------------------------------------------------------------------------------------------------------------------------------------------------------------------------------------------------------------------------------------------------------------------------------------------------------------------------------------------------------------------------------------------------------------------------------------------------------------------------------------------------------------------------------------------------------------------------------------------------------------------|
| <p><b>General Details</b></p> <ul style="list-style-type: none"> <li>• Author(s)</li> <li>• Year of publication</li> <li>• Study location/ Country of publication</li> </ul> <p><b>Study Characteristics</b></p> <ul style="list-style-type: none"> <li>• Clinician's discipline (i.e. family physician, psychiatrist, mental health nurse, ED nurse)</li> <li>• Patient population (e.g. diagnosis, age)</li> <li>• Healthcare setting (i.e. primary care, ED, inpatient, outpatient)</li> <li>• Study Methodology (i.e. qualitative, quantitative, mixed methods)</li> </ul> <p><b>Non-patient specific factors affecting suicide risk assessment (RQ1)</b></p> <ul style="list-style-type: none"> <li>• Factor(s) reported on as affecting suicide risk assessment (e.g. clinician's age, clinician's experience level, time, patient's legal status)</li> <li>• Overall effect of factors on suicide risk assessment process (i.e. barrier, facilitator)</li> </ul> <p><b>Biases (RQ2)</b></p> <ul style="list-style-type: none"> <li>• Types of biases listed within study (as previously classified by Crosskerry 2003<sup>22</sup>)</li> </ul> <p><b>Training and educational initiatives (RQ3)</b></p> <ul style="list-style-type: none"> <li>• Descriptions of training and educational initiatives that have aided clinicians with suicide risk assessment</li> </ul> |
|---------------------------------------------------------------------------------------------------------------------------------------------------------------------------------------------------------------------------------------------------------------------------------------------------------------------------------------------------------------------------------------------------------------------------------------------------------------------------------------------------------------------------------------------------------------------------------------------------------------------------------------------------------------------------------------------------------------------------------------------------------------------------------------------------------------------------------------------------------------------------------------------------------------------------------------------------------------------------------------------------------------------------------------------------------------------------------------------------------------------------------------------------------------------------------------------------------------------------------------------------------------------------------------------------------------------------------------------------------------------------------|

Any additional details that pertain to the research questions will be detailed. This step will include an interactive process in which the two data extractors will revise the data-charting form as required.

#### 5. Collating, summarising and reporting the articles

To effectively present an overview of the information retrieved, and to establish the extent and nature of the literature on this topic, the results of the review will be presented using: (1) a PRISMA flow chart to identify the number of articles present at every major stage (2) a simple quantitative analysis using simple descriptive statistics including: the distribution of studies geographically; distribution of studies by different clinician and patient populations; the research methods adopted; and the range of contextual factors included in the review; and (3) a qualitative narrative synthesis of the content of included articles.

The qualitative narrative synthesis will include a focus on three overarching topics, as identified by the three research questions. The first will include a breakdown of the non-patient specific factors affecting the suicide risk assessment process, while the second will report on results of the types of cognitive biases that emerge within the suicide risk assessment process. In order to organize the results within these two research questions, the Situated Clinical Decision Making (SCDM) framework<sup>34</sup> will be employed. The SCDM framework was initially developed by Gillespie and Peterson (2005) as a means to help novice nurses reflect on the decisions they made within clinical practice, and as an aid in developing specific expertise. The framework balances depth with complexity, and incorporates components from *context*, *foundational knowledge* and *clinical decision-making processes*. For the purposes of the first research question, we will use the three contextual factors components, as follows:<sup>35</sup> (1) Micro level – this level is inclusive of the clinician and patient. Examples can include the importance of therapeutic alliance, moral or ethical issues present, the clinician’s experience level relative to their patient assignment, the clinician’s personal capacity for communication, the clinician’s confidence, and the patient complexity; (2) Meso level – this level is inclusive of organizational factors that may affect a clinician’s decision making, such as unit culture, workload and staffing patterns, availability of resources, and communication with the rest of the team; and (3) Macro level – this final level includes broader societal, governmental and professional related concepts that may affect the process. Results for the second research question will fall within the Clinical Decision Making Processes construct, which focuses on cues, biases, and intuitive processes that may impact a clinician’s decision making ability. Finally, results for the third research question will be collated and reported through a narrative approach, summarizing education strategies and types of training initiatives found to help improve a clinician’s decision making around suicide risk assessment.

## **ETHICS AND DISSEMINATION**

### **6. Consulting and translating knowledge**

This protocol presents a scoping review that will contribute to the advancement of the topic of suicide risk assessment, focusing in on an often understudied aspect of clinical decision making and the risk assessment process. This review will identify gaps in knowledge and research, while also helping to inform best practice. Approval from the Research Ethics Board is not required for this review. This review will guide the direction of future research on this topic, and aid in improving training and education around this practice.

1  
2  
3 An integrated knowledge translation approach will be used by engaging knowledge users over  
4 the course of the study. Our team includes multiple knowledge users - two psychiatrists, a mental  
5 health nurse, and a decision maker in medical education. The team will review results and  
6 emerging themes to ensure validity and credibility, and will also collectively help ensure that  
7 study findings meet the needs of healthcare professionals and educators. Results will be  
8 published in a peer-reviewed decision-making journal such as BMC Medical Informatics and  
9 Decision Making or a topical journal such as Suicide and Life-Threatening Behaviour or  
10 Archives of Suicide Research, as well as be presented at academic conferences such as Canadian  
11 Association for Health Services and Policy Research (CAHSPR) or E-Mental Health  
12 Conference. Finally, educational materials will be created to disseminate study findings to  
13 appropriate mental health professionals.  
14  
15  
16  
17  
18  
19  
20  
21  
22  
23  
24  
25  
26  
27  
28  
29  
30  
31  
32  
33  
34  
35  
36  
37  
38  
39  
40  
41  
42  
43  
44  
45  
46  
47  
48  
49  
50  
51  
52  
53  
54  
55  
56  
57  
58  
59  
60

**AUTHOR CONTRIBUTIONS**

The design and development of this study was led by LS, who also drafted the protocol. JS, DW, GS and VD provided guidance to the study conceptualization and protocol development and have revised all drafts of this manuscript. SB, an experienced medical librarian, developed the search strategy, conducted the search and edited the manuscript. All authors give approval to the publishing of this protocol manuscript.

**FUNDING**

This research received no specific grant from any funding agency in the public, commercial or not-for-profit sectors.

**COMPETING INTERESTS STATEMENT**

None to declare.

**REFERENCES:**

1. WHO. Depression (Fact sheet) 2017 [Available from: <http://www.who.int/mediacentre/factsheets/fs369/en/>].
2. Luoma JB, Martin CE, Pearson JL. Contact with mental health and primary care providers before suicide: a review of the evidence. *American Journal of Psychiatry* 2002;159(6):909-16.
3. Oquendo MA, Bernanke JA. Suicide risk assessment: tools and challenges. *World psychiatry* 2017;16(1):28-29.
4. Grove WM, Zald DH, Lebow BS, et al. Clinical versus mechanical prediction: a meta-analysis. *Psychological assessment* 2000;12(1):19.
5. Franklin JC, Ribeiro JD, Fox KR, et al. Risk factors for suicidal thoughts and behaviors: A meta-analysis of 50 years of research. 2016
6. Beck AT, Steer RA, Carbin MG. Psychometric properties of the Beck Depression Inventory: Twenty-five years of evaluation. *Clinical psychology review* 1988;8(1):77-100.
7. Posner K, Brent D, Lucas C, et al. Columbia-suicide severity rating scale (C-SSRS). *New York, NY: Columbia University Medical Center* 2008
8. Cutcliffe JR, Barker P. The Nurses' Global Assessment of Suicide Risk (NGASR): developing a tool for clinical practice. *Journal of psychiatric and mental health nursing* 2004;11(4):393-400.
9. Patterson WM, Dohn HH, Bird J, et al. Evaluation of suicidal patients: the SAD PERSONS scale. *Psychosomatics* 1983;24(4):343-49.
10. Perlman C, Neufeld E, Martin L, et al. Suicide risk assessment inventory: A resource guide for Canadian health care organizations. *Toronto, ON: Ontario Hospital Association and Canadian Patient Safety Institute [Internet]* 2011
11. Barak-Corren Y, Castro VM, Javitt S, et al. Predicting suicidal behavior from longitudinal electronic health records. *American journal of psychiatry* 2016;appi. ajp. 2016.16010077.
12. Tran T, Luo W, Phung D, et al. Risk stratification using data from electronic medical records better predicts suicide risks than clinician assessments. *BMC Psychiatry* 2014;14:76.
13. Passos IC, Mwangi B, Cao B, et al. Identifying a clinical signature of suicidality among patients with mood disorders: a pilot study using a machine learning approach. *Journal of affective disorders* 2016;193:109-16.
14. Walsh CG, Ribeiro JD, Franklin JC. Predicting risk of suicide attempts over time through machine learning. *Clinical Psychological Science* 2017;5(3):457-69.
15. Amarasingham R, Patzer RE, Huesch M, et al. Implementing electronic health care predictive analytics: considerations and challenges. *Health Affairs* 2014;33(7):1148-54.
16. Wasserman D, Rihmer Z, Rujescu D, et al. The European Psychiatric Association (EPA) guidance on suicide treatment and prevention. *European psychiatry* 2012;27(2):129-41.
17. WHO. Preventing Suicide: A global imperative. World Health Organization, 2014.
18. NICE. Self harm (longer term management). NICE Guideline (CG133). 2011
19. Bolton JM, Gunnell D, Turecki G. Suicide risk assessment and intervention in people with mental illness. *BMJ: British Medical Journal* 2015;351(8034)
20. Smyth O, McCabe C. Think and think again! Clinical decision making by advanced nurse practitioners in the Emergency Department. *International Emergency Nursing* 2017;31:72-74.

- 1
- 2
- 3
- 4 21. Kahneman D. Thinking, fast and slow: Macmillan 2011.
- 5 22. Croskerry P. The importance of cognitive errors in diagnosis and strategies to minimize
- 6 them. *Academic medicine* 2003;78(8):775-80.
- 7 23. Pease JL, Forster JE, Davidson CL, et al. How Veterans Health Administration Suicide
- 8 Prevention Coordinators Assess Suicide Risk. *Clinical Psychology & Psychotherapy*
- 9 2017;24(2):401-10.
- 10 24. Berman NC, Stark A, Cooperman A, et al. Effect of patient and therapist factors on suicide
- 11 risk assessment. *Death studies* 2015;39(7):433-41.
- 12 25. Eriksen K, Kress VE. Beyond the DSM story: Ethical quandaries, challenges, and best
- 13 practices: Sage 2004.
- 14 26. Weiland T, Cotter A, Jelinek G, et al. Suicide risk assessment in Australian emergency
- 15 departments: assessing clinicians' disposition decisions. *Psychiatry journal* 2014;2014
- 16 27. Colquhoun HL, Levac D, O'Brien KK, et al. Scoping reviews: time for clarity in definition,
- 17 methods, and reporting. *Journal of clinical epidemiology* 2014;67(12):1291-94.
- 18 28. Arksey H, O'Malley L. Scoping studies: towards a methodological framework. *International*
- 19 *journal of social research methodology* 2005;8(1):19-32.
- 20 29. Levac D, Colquhoun H, O'Brien KK. Scoping studies: advancing the methodology.
- 21 *Implementation Science* 2010;5(1):69.
- 22 30. Tricco AC, Lillie E, Zarin W, et al. PRISMA Extension for Scoping Reviews (PRISMA-
- 23 ScR): Checklist and Explanation. *Annals of Internal Medicine* 2018
- 24 31. Medicine USNLo. Fact Sheet: MEDLINE, PubMed, and PMC (PubMed Central): How are
- 25 they different? [Available from: [https://](https://www.nlm.nih.gov/pubs/factsheets/dif_med_pub.html)
- 26 [www.nlm.nih.gov/pubs/factsheets/dif\\_med\\_pub.html](https://www.nlm.nih.gov/pubs/factsheets/dif_med_pub.html)
- 27 32. Whitlock J, Minton R, Babington, P. et al. The relationship between non-suicidal self-injury
- 28 and suicide. *The Information Brief Series, Cornell Research Program on Self-Injury and*
- 29 *Recovery Cornell University, Ithaca, NY* 2015
- 30 33. Landis JR, Koch GG. The measurement of observer agreement for categorical data.
- 31 *biometrics* 1977:159-74.
- 32 34. Gillespie M, Peterson BL. Helping Novice Nurses Make Effective Clinical Decisions: The
- 33 Situated Clinical Decision-Making Framework. *Nursing education perspectives*
- 34 2009;30(3):164-70.
- 35 35. Gillespie M. Using the Situated Clinical Decision-Making framework to guide analysis of
- 36 nurses' clinical decision-making. *Nurse Education in Practice* 2010;10(6):333-40.
- 37
- 38
- 39
- 40
- 41
- 42
- 43
- 44
- 45
- 46
- 47
- 48
- 49
- 50
- 51
- 52
- 53
- 54
- 55
- 56
- 57
- 58
- 59
- 60

## PRISMA Extension for Scoping Reviews (PRISMA-ScR): Checklist

| Section                                              | PRISMA-ScR Checklist Item - Explanation                                                             |
|------------------------------------------------------|-----------------------------------------------------------------------------------------------------|
| <b>Title</b>                                         | Identified the report as a scoping review                                                           |
| <b>Abstract</b>                                      |                                                                                                     |
| Structured summary                                   | Provided a structured summary including: introduction, methods & analysis, ethics and dissemination |
| <b>Introduction</b>                                  |                                                                                                     |
| Rationale                                            | Rationale for the review has been described                                                         |
| Objectives                                           | Research objectives and questions have been stated                                                  |
| <b>Methods</b>                                       |                                                                                                     |
| Protocol and registration                            | This is a protocol                                                                                  |
| Eligibility Criteria                                 | Detailed study selection section is present                                                         |
| Information sources                                  | All databases that the scoping review will be conducted in has been detailed                        |
| Search                                               | Search strategy for MEDLINE is presented                                                            |
| Selection of sources of evidence                     | Detailed study selection section is present                                                         |
| Data charting process                                | Data charting section is present                                                                    |
| Data items                                           | Items/ information that will be extracted has been listed                                           |
| Critical appraisal of individual sources of evidence | Not applicable in the protocol                                                                      |
| Summary measures                                     | Not applicable for scoping reviews                                                                  |
| Synthesis of results                                 | Detailed how the data will be summarized.                                                           |
| Risk of bias across studies                          | Not applicable for scoping reviews                                                                  |
| Additional analyses                                  | Not applicable for scoping reviews                                                                  |
| <b>Results</b>                                       |                                                                                                     |
| Selection of sources of evidence                     | PRISMA Flow Diagram will be present in scoping review                                               |
| Characteristics of sources of evidence               | Not applicable in protocol: Will be detailed in the scoping review                                  |
| Critical appraisal within sources of                 | Not applicable                                                                                      |



1  
2  
3 evidence

4 Results of individual sources of evidence Not applicable in protocol: Will be detailed in  
5 the scoping review  
6

7  
8 Synthesis of results Not applicable in protocol: Will be detailed in  
9 the scoping review  
10

11 Risk of bias across studies Not applicable for scoping reviews

12 Additional analyses Not applicable for scoping reviews  
13

#### 14 **Discussion**

15 Summary of evidence Not applicable in protocol: Will be detailed in  
16 the scoping review  
17

18 Limitations Limitations mentioned in the “Strengths and  
19 limitations section. Detailed limitations of the  
20 scoping review process will be detailed in the  
21 scoping review  
22

23  
24 Conclusions Not applicable in protocol: Will be detailed in  
25 the scoping review  
26

#### 27 **Funding**

28 Funding section is present  
29  
30  
31  
32  
33  
34  
35  
36  
37  
38  
39  
40  
41  
42  
43  
44  
45  
46  
47  
48  
49  
50  
51  
52  
53  
54  
55  
56  
57  
58  
59  
60

# BMJ Open

## Factors influencing suicide risk assessment clinical practice: protocol for a scoping review

|                                 |                                                                                                                                                                                                                                                                                                                                                                                                                                                                                                                                                                                    |
|---------------------------------|------------------------------------------------------------------------------------------------------------------------------------------------------------------------------------------------------------------------------------------------------------------------------------------------------------------------------------------------------------------------------------------------------------------------------------------------------------------------------------------------------------------------------------------------------------------------------------|
| Journal:                        | <i>BMJ Open</i>                                                                                                                                                                                                                                                                                                                                                                                                                                                                                                                                                                    |
| Manuscript ID                   | bmjopen-2018-026566.R1                                                                                                                                                                                                                                                                                                                                                                                                                                                                                                                                                             |
| Article Type:                   | Protocol                                                                                                                                                                                                                                                                                                                                                                                                                                                                                                                                                                           |
| Date Submitted by the Author:   | 21-Nov-2018                                                                                                                                                                                                                                                                                                                                                                                                                                                                                                                                                                        |
| Complete List of Authors:       | Sequeira, Lydia; University of Toronto Institute of Health Policy Management and Evaluation; Centre for Addiction and Mental Health, Information Management Group<br>Strudwick, Gillian; Centre for Addiction and Mental Health, Information Management Group<br>Bailey, Sharon; Centre for Addiction and Mental Health - Russell Street Site, Library<br>De Luca, Vincenzo; Centre for Addiction and Mental Health , Schizophrenia Program<br>Wiljer, David; University Health Network,<br>Strauss, John; Centre for Addiction and Mental Health, Child, Youth and Family Program |
| <b>Primary Subject Heading</b>: | Mental health                                                                                                                                                                                                                                                                                                                                                                                                                                                                                                                                                                      |
| Secondary Subject Heading:      | Health services research                                                                                                                                                                                                                                                                                                                                                                                                                                                                                                                                                           |
| Keywords:                       | suicide, risk assessment, clinical decision making, organizational factors, cognitive bias                                                                                                                                                                                                                                                                                                                                                                                                                                                                                         |
|                                 |                                                                                                                                                                                                                                                                                                                                                                                                                                                                                                                                                                                    |

SCHOLARONE™  
Manuscripts

1  
2  
3 **Title:** Factors influencing suicide risk assessment clinical practice: protocol for a scoping review  
4  
5

6 **Authors:** Lydia Sequeira, MHI,<sup>1,2</sup> Gillian Strudwick, PhD, RN,<sup>1,2</sup> Sharon M. Bailey, MI<sup>2</sup>  
7 Vincenzo De Luca, MD,<sup>2,3</sup> David Wiljer, PhD,<sup>1-4</sup> John Strauss, MD<sup>1,2,3</sup>  
8  
9

10  
11 **Authors' affiliations:**  
12

- 13 1. Institute of Health Policy, Management and Evaluation (IHPME), Dalla Lana School of  
14 Public Health, University of Toronto, Toronto, Ontario, Canada
- 15 2. Centre for Addiction and Mental Health (CAMH), Toronto, Ontario, Canada
- 16 3. Faculty of Medicine, Department of Psychiatry, University of Toronto, Toronto, Ontario,  
17 Canada
- 18 4. UHN Digital, University Health Network (UHN), Toronto, Ontario, Canada  
19  
20

21  
22 **Correspondence to:** Lydia Sequeira, MHI  
23 7153, 100 Stokes St., Toronto, Ontario, Canada M6J 1H4  
24 Phone: 416 535-8501 x 33575  
25 E-mail: lydia.sequeira@mail.utoronto.ca  
26  
27  
28  
29

30  
31 **Word Count: 2,541**  
32  
33  
34  
35  
36  
37  
38  
39  
40  
41  
42  
43  
44  
45  
46  
47  
48  
49  
50  
51  
52  
53  
54  
55  
56  
57  
58  
59  
60

## ABSTRACT

### Introduction

Every year, suicide accounts for nearly 800,000 deaths worldwide. Appropriate risk assessment and intervention is imperative since evidence demonstrates that a large proportion of those who die by suicide visit health professionals prior to their death. Much previous research has focused on identifying patient level risk factors that can improve the risk assessment process through scales and algorithms. However, best practice guidelines emphasize the importance of clinical interviews and prioritize the clinician's final judgment. The purpose of this review is to (1) understand the clinician and organizational level barriers and facilitators that influence a clinician's assessment of suicide risk, (2) identify the types of biases that exist within this process, and (3) list any evidence-based training protocols and educational initiatives to aid (or support) clinicians with this process.

### Methods and analysis

This scoping review protocol uses the Arksey and O'Malley framework, and PRISMA reporting guidelines for scoping reviews. Literature will be identified using a multi-database search strategy developed in consultation with a medical librarian. The proposed screening process consists of a title and abstract scan, followed by a full-text review by two reviewers to determine the eligibility of articles. Studies outlining any factors that affect a clinician's suicide risk assessment process, ranging from individual experience and behaviours to organizational level influences will be included. A tabular synthesis of the general study details will be provided, as well as a narrative synthesis of the extracted data, organized into themes using the Situated Clinical Decision-Making framework.

### Ethics and dissemination

Ethical approval is not required for this review. Results will be translated into educational materials and presentations for dissemination to appropriate knowledge users. Knowledge outputs will also include academic presentations at relevant conferences, and a published, peer-reviewed journal article.

### Keywords

Suicide, risk assessment, clinical decision making, organizational factors, cognitive bias

## STRENGTHS AND LIMITATIONS OF THIS STUDY

- Findings from this review will aid in providing a catalogue of broader, non-patient related factors that affect the suicide risk assessment process.
- Strengths of this study include the importance of the topic to the suicide risk assessment process, use of an established scoping review methodology, a rigorous search strategy developed by a medical librarian, and a systematic study selection and data extraction process carried out by two health service researchers.
- Limitations include the restriction to English language studies and the potential to miss relevant studies in the grey literature.
- Consultation with content experts will be included to mitigate some of the limitations, however it should be noted that this process can also introduce a risk of bias to the final findings.

## INTRODUCTION

Every year, close to 800,000 individuals die by suicide around the world.<sup>1</sup> Among these, research from the United States has shown that around 45% of individuals have visited mental health and primary care providers in the month prior to their death.<sup>2</sup> Therefore, targeting healthcare providers for appropriate suicide risk assessment and intervention is imperative. Assessing and managing suicide risk is considered a core competency of mental health care. This process of risk assessment and management for suicide is best understood as structured evaluation, intervention and subsequent re-assessment of a patient's likelihood to attempt suicide.<sup>3</sup> Clinicians from different disciplines carry out risk assessment across a variety of care settings, often with distinct goals and scopes of practice. Within primary care, the key goal is to determine whether an individual must be referred to a more specialized care environment, whereas within emergency rooms, the goal is often to decide whether a patient can be discharged from the hospital or requires a more restrictive level of care. Finally, within inpatient mental health settings, ongoing screening is usually required to determine what the best plan of action is for patients that are admitted due to being at high risk of suicide.<sup>4</sup>

Risk assessment falls within the scope of decision making, of which there are largely two classes – clinical judgement (or clinical decision making), which refers to a clinician's expert opinion based on their data gathering, and mechanical prediction, which refers to purely statistical and algorithmic prediction. A previous meta-analysis of 136 studies of human health and behaviour demonstrated that mechanical prediction was consistently more accurate than clinical judgement.<sup>5</sup> With large public concern surrounding deaths by suicide, much research over the past 50 years within this field has focused on identifying patient risk factors<sup>6</sup> and developing risk assessment tools to better recognize patients at highest risk of committing suicide, including the Beck Hopelessness Scale<sup>7</sup>, Columbia-Suicide Severity Rating Scale<sup>8</sup>, Nurses' Global Assessment of Suicide Risk<sup>9</sup> and SAD PERSONS<sup>10</sup>, among others. Unfortunately, there has been limited supporting evidence for the use of risk scores from these tools as the sole basis for decision making since the predictive ability of these tools are rather low, given a low overall prevalence of suicides in the general population (0.01%).<sup>4</sup>

Due to the large evidence base showing the lack of predictability and lack of effectiveness of the many developed suicide risk assessment tools, such tools have been presented as more of an aid for clinical decision making to uncover pertinent information,<sup>4</sup> rather than guide clinical judgement. World Health Organization (WHO) guidelines suggest that suicide risk should be specifically evaluated with clinical interviews assessing psychological and social functioning of the patient.<sup>11 12</sup> The NICE guidelines on suicide risk assessment similarly emphasize the importance of the clinician's final judgment, and recommend to "not use risk assessment tools and scales to predict future suicide"<sup>13</sup>. Given the challenges in behaviour prediction, a state-of-the-art review on the topic has prompted the need for understanding what constitutes a reasonable standard of care in suicide risk assessment.<sup>14</sup>

1  
2  
3 There are a multiplicity of concerns complicating the clinical management of suicide risk, and  
4 despite the increasing focus on targeting risk assessment and prevention interventions at high  
5 risk patients, little is known about the contextual, non-patient specific factors that influence a  
6 clinician's decision-making process while conducting a suicide risk assessment. Clinical  
7 experience, a thorough knowledge base and the ability to think critically, are a few of the many  
8 skills required for any clinical decision-making process.<sup>15</sup> Theories on decision making based on  
9 human thought processes have suggested a dual decision-making theory wherein clinicians use  
10 both intuitive and analytical processes.<sup>16</sup> Intuitive decisions are fast and abbreviated, making use  
11 of heuristics and shortcuts for familiar scenarios. Occasionally, this use of shortcuts can lead to  
12 overconfidence and complacency, predisposing the clinician to biased decisions.<sup>17</sup> It is important  
13 to understand how clinicians' cognitive factors such as intuition and experience contribute to  
14 their risk formulation process and confidence in their decision. An important starting line for  
15 educational and training purposes is to identify the variety of clinical experiences that exist  
16 within the practice of suicide risk assessment<sup>18</sup>, and to understand the barriers and facilitators for  
17 consistent clinical practice.  
18  
19  
20  
21  
22

23 This paper outlines a protocol for a scoping review, with the primary purpose being to  
24 understand how clinician and organizational level characteristics - factors other than patient-level  
25 ones - can influence the suicide risk assessment process, highlighting that mental health  
26 professionals are not free of biases, some of which can unsuspectingly affect their decisions.<sup>19 20</sup>  
27 <sup>21</sup> The findings from this review will allow us to explore the broad topic of suicide risk  
28 assessment and increase awareness of these factors. Increased awareness of these elements can  
29 eventually lead to more efficient practice.  
30  
31  
32

### 33 **Methods and analysis**

34 The scoping review is a rigorous and systematic method for mapping key concepts, research  
35 areas and gaps in knowledge, especially in an area that has not been comprehensively reviewed  
36 before.<sup>22</sup> One of its main strengths include presenting the results in an accessible format for  
37 knowledge users.  
38  
39

40 This review follows the seminal framework outlined by Arksey and O'Malley<sup>23</sup>, and advanced by  
41 Levac *et al.*<sup>24</sup> Arksey and O'Malley propose a six step framework for carrying out a scoping  
42 review, including: (1) identifying the research question, (2) identifying relevant literature, (3)  
43 study selection, (4) charting the data, (5) collating, summarizing and reporting the articles and  
44 (6) consulting and translating knowledge.<sup>23</sup> In order to ensure relevance to patient care, our study  
45 team also includes knowledge users. This protocol uses the recently developed 20 item Preferred  
46 reporting items for systematic reviews and meta-analysis extension for Scoping Reviews  
47 (PRISMA- ScR)<sup>25</sup> to ensure appropriate rigor. The scoping review searches will be completed in  
48 the Fall of 2018, and subsequent analysis of the literature search findings will be completed in  
49 early 2019.  
50  
51  
52

53 Detailed further below are the various steps involved within the Arksey and O'Malley process, as  
54 applied to this scoping review:  
55  
56  
57

## 1. Identifying the research question

The aim of this scoping review is to identify the personal, professional and organizational level barriers and facilitators that influence the suicide risk assessment process carried out by a clinician. To meet these aims, this review seeks to answer the following questions:

1. What non-patient specific factors influence the suicide risk assessment process (i.e. how a clinician conducts a suicide risk assessment, and how they arrive at their final clinical judgement, given their scope of practice)?
2. What types of inherent clinician biases can exist within this process?
3. Is there evidence of training and educational initiatives that have helped clinicians improve upon these contextual factors?

## 2. Identifying relevant studies

The comprehensive search strategy was iteratively developed in consultation with a medical librarian (SB), and was validated through the retrieval of a key set of relevant studies. To ensure a comprehensive search of the health sciences literature, we used the following primary electronic databases: MEDLINE, PsycINFO, Embase, CINAHL, and ERIC. The search query was first developed in MEDLINE, using the Ovid interface which allows for fine-tuning using Medical Subject Headings (MeSH) indexed by the National Library of Medicine's controlled vocabulary.<sup>26</sup> Preliminary results from searching within MEDLINE has identified 860 total articles, as of November 2019. The Ovid interface also allows for a more accurate translation of the search strategy to query other Ovid-based databases such as PsycINFO and Embase.

The search strategy consisted of subject headings, keywords and related terms for the concepts of suicide risk assessment and experiences of health personnel relating to this behaviour. Terms for the concept of suicide risk assessment included "risk assessment" combined with "suicide", "suicidal ideation" or "suicide attempt". The primary search terms for the concept of clinicians' experiences included "attitude of health personnel", "knowledge, attitudes and practice" and "physician-patient relations". A detailed search strategy can be found in Table 1.

Our search is limited to the English journal articles, without date or study type restrictions. All bibliographic results from the search were stored using the citation management program EndNote [<http://endnote.com/>]. The citations will also be downloaded into Covidence, a literature review software for screening, charting and tabulation purposes.

Table 1: Search Strategy for OVID Medline

|   |                                                                                                                                                                             |
|---|-----------------------------------------------------------------------------------------------------------------------------------------------------------------------------|
| 1 | Risk Assessment/ or "Healthcare Failure Mode and Effect Analysis"/ or (risk* adj4 assess*).ti,ab,kf.                                                                        |
| 2 | Suicide/ or Suicidal Ideation/ or Suicide, Attempted/ or suicid*.ti,ab,kf.                                                                                                  |
| 3 | "Attitude of Health Personnel"/ or Practice Patterns, Physicians'/ or Bias/ or Observer Variation/ or exp Prejudice/ or Culturally Competent Care/ or Alert Fatigue, Health |



|    |                                                                                          |
|----|------------------------------------------------------------------------------------------|
| 1  |                                                                                          |
| 2  |                                                                                          |
| 3  |                                                                                          |
| 4  | Personnel/ or Physician-Patient Relations/ or Professional-Patient Relations/ or Nurse-  |
| 5  | Patient Relations/ or Nonverbal Communication/ or Health Knowledge, Attitudes, Practice/ |
| 6  | or Clinical Competence/ or Clinical Decision-Making/ or Clinical Protocols/ or Duty to   |
| 7  | Warn/ or Clinical Decision-Making/ or Ethics, Medical/ or Professional Role/ or Nurse's  |
| 8  | Role/ or Physician's Role/                                                               |
| 9  | 4 Inservice Training/ or Simulation Training/ or Staff Development/ or Education,        |
| 10 | Continuing/ or Education, Nursing, Continuing/ or Education, Medical, Continuing/ or     |
| 11 | "Internship and Residency"/ or Teaching Rounds/                                          |
| 12 | 5 exp Health Occupations/ or exp Health Personnel/ or (clinician* or "health care        |
| 13 | professional*" or "healthcare professional*").ti,ab,kf.                                  |
| 14 |                                                                                          |
| 15 | 6 or/3-5                                                                                 |
| 16 | 7 and/1-2,6                                                                              |
| 17 |                                                                                          |
| 18 | 8 limit 7 to English language                                                            |

Table 1 Legend

| Code | Description                                                                                                                |
|------|----------------------------------------------------------------------------------------------------------------------------|
| /    | indicates that a term is a subject heading                                                                                 |
| adj4 | searches within 4 words of each other (4 words before and 4 words after) in either direction                               |
| *    | truncation technique to broaden search to include words with different endings and spellings                               |
| ti   | searches field that contains the English language version of a title                                                       |
| ab   | searches author-written abstracts                                                                                          |
| kf   | retrieves every keyword heading that includes the particular word                                                          |
| exp  | indicates that a subject heading is "exploded" to include all of the narrower subject headings beneath it in the hierarchy |

### 3. Study Selection

After a combined pilot with both reviewers, to ensure common understanding of the inclusion criteria, all articles will be independently screened in two stages. Study eligibility will be determined beginning with a title and abstract scan, followed by a full-text review stage.

In order to be eligible, studies must involve the following criteria: (i) study the risk screening or assessment process around suicide (ii) include clinicians' thinking, attitudes, or experiences, and (iii) apply to patients being assessed within primary care, EDs, or mental health and addiction outpatient or inpatient settings. We will include published literature reporting on previous literature reviews, quantitative, qualitative, mixed or multi-methods research. Exclusions will include articles primarily detailing the assessment of risk of Deliberate Self Harm (DSH) or Non-Suicidal Self Injury (NSSI). This is because DSH and NSSI differs from suicidal behaviours in intent, level of lethality, level of psychological pain and cognitive constriction. In general, DSH and NSSI are behavior undertaken to feel better or cope, whereas suicide-related behaviors are undertaken to end the capacity to feel at all by ending one's life.<sup>27</sup>

Ratings will be documented on the Covidence software as ‘Yes’, ‘No’ or ‘Maybe’, and at the end of each round, ratings will be compared and resolved by the pair through discussion and consensus, with a third reviewer in case of no further resolution. All reviewers will use a pilot-tested screening form developed for this review, including the 3 main criteria listed above. The inter-rater reliability will be calculated, with a Cohen’s Kappa threshold of greater than or equal to 0.70, indicating substantial agreement.<sup>28</sup>

#### 4. Charting the data

Charting data involves organising and interpreting data by sifting and sorting through material according to key issues and themes.<sup>23</sup> Included studies will be reviewed and charted independently by the two reviewers, using a standardized charting form including the required data, where available. Details of the charting form can be found within Table 2.

Table 2: Charting details

|                                                                                                                                                                                                                                                                                                                                                                                                                                                                                                                                                                                                                                                                                                                                                                                                                                                                                                                                                                                                                                                                                                                                                                                                                                                                                                                                                                                 |
|---------------------------------------------------------------------------------------------------------------------------------------------------------------------------------------------------------------------------------------------------------------------------------------------------------------------------------------------------------------------------------------------------------------------------------------------------------------------------------------------------------------------------------------------------------------------------------------------------------------------------------------------------------------------------------------------------------------------------------------------------------------------------------------------------------------------------------------------------------------------------------------------------------------------------------------------------------------------------------------------------------------------------------------------------------------------------------------------------------------------------------------------------------------------------------------------------------------------------------------------------------------------------------------------------------------------------------------------------------------------------------|
| <p><b>General Details</b></p> <ul style="list-style-type: none"> <li>• Author(s)</li> <li>• Year of publication</li> <li>• Study location/ Country of publication</li> </ul> <p><b>Study Characteristics</b></p> <ul style="list-style-type: none"> <li>• Clinician’s discipline (i.e. family physician, psychiatrist, mental health nurse, ED nurse)</li> <li>• Patient population (e.g. diagnosis, age)</li> <li>• Healthcare setting (i.e. primary care, ED, inpatient, outpatient)</li> <li>• Study Methodology (i.e. qualitative, quantitative, mixed methods)</li> </ul> <p><b>Non-patient specific factors affecting suicide risk assessment (RQ1)</b></p> <ul style="list-style-type: none"> <li>• Factor(s) reported on as affecting suicide risk assessment (e.g. clinician’s age, clinician’s experience level, time, patient’s legal status)</li> <li>• Overall effect of factors on suicide risk assessment process (i.e. barrier, facilitator)</li> </ul> <p><b>Biases (RQ2)</b></p> <ul style="list-style-type: none"> <li>• Types of biases listed within study (as previously classified by Crosskerry 2003<sup>17</sup>)</li> </ul> <p><b>Training and educational initiatives (RQ3)</b></p> <ul style="list-style-type: none"> <li>• Descriptions of training and educational initiatives that have aided clinicians with suicide risk assessment</li> </ul> |
|---------------------------------------------------------------------------------------------------------------------------------------------------------------------------------------------------------------------------------------------------------------------------------------------------------------------------------------------------------------------------------------------------------------------------------------------------------------------------------------------------------------------------------------------------------------------------------------------------------------------------------------------------------------------------------------------------------------------------------------------------------------------------------------------------------------------------------------------------------------------------------------------------------------------------------------------------------------------------------------------------------------------------------------------------------------------------------------------------------------------------------------------------------------------------------------------------------------------------------------------------------------------------------------------------------------------------------------------------------------------------------|

Any additional details that pertain to the research questions will be detailed. This step will include an iterative process in which the two data extractors will revise the data-charting form as

1  
2  
3 required.

## 4 5 6 **5. Collating, summarising and reporting the articles**

7  
8 To effectively present an overview of the information retrieved, and to establish the extent and  
9 nature of the literature on this topic, the results of the review will be presented using a PRISMA  
10 flow chart to identify the number of articles present at every major stage. Additionally, a tabular  
11 synthesis of the distribution of studies geographically (i.e. country of origin), distribution of  
12 studies by different clinician (e.g. nurses, primary care doctors) and patient populations (e.g.  
13 inpatient, outpatient, community mental health), methodology adopted (i.e. study design details)  
14 will also be included. This tabular synthesis will focus on metadata of the studies, and not consist  
15 of any statistical analysis of the results from the various studies. Using Covidence, we will be  
16 able to create a PRISMA flow chart and tabulate the required results. Finally, a qualitative  
17 narrative synthesis of the content of included articles will be presented.  
18  
19  
20

21 The qualitative narrative synthesis will include a focus on three overarching topics, as identified  
22 by the three research questions. The first will include a breakdown of the non-patient specific  
23 factors affecting the suicide risk assessment process, while the second will report on results of  
24 the types of cognitive biases that emerge within the suicide risk assessment process. In order to  
25 organize the results within these two research questions, the Situated Clinical Decision-Making  
26 (SCDM) framework<sup>29</sup> will be employed. The SCDM framework was initially developed by  
27 Gillespie and Peterson (2005) as a means to help novice nurses reflect on the decisions they  
28 made within clinical practice, and as an aid in developing specific expertise. The framework  
29 balances depth with complexity, and incorporates components from *context*, *foundational*  
30 *knowledge* and *clinical decision-making processes*. For the purposes of the first research  
31 question, we will use the three contextual factors components, as follows:<sup>30</sup> (1) Micro level – this  
32 level is inclusive of the clinician and patient. Examples can include the importance of therapeutic  
33 alliance, moral or ethical issues present, the clinician’s experience level relative to their patient  
34 assignment, the clinician’s personal capacity for communication, the clinician’s confidence, and  
35 the patient complexity; (2) Meso level – this level is inclusive of organizational factors that may  
36 affect a clinician’s decision making, such as unit culture, workload and staffing patterns,  
37 availability of resources, and communication with the rest of the team; and (3) Macro level – this  
38 final level includes broader societal, governmental and professional related concepts that may  
39 affect the process. Results for the second research question will fall within the Clinical Decision-  
40 Making Processes construct, which focuses on cues, biases, and intuitive processes that may  
41 impact a clinician’s decision-making ability. Finally, results for the third research question will  
42 be collated and reported through a narrative approach, summarizing education strategies and  
43 types of training initiatives found to help improve a clinician’s decision making around suicide  
44 risk assessment.  
45  
46  
47  
48  
49  
50  
51

### 52 **Patient and Public Involvement**

53 We will include consultation from stakeholder clinicians (i.e. an interdisciplinary suicide risk  
54 working group within a mental health hospital). Through providing these clinicians with  
55 preliminary results of the scoping review, they will be consulted on for suggestions for additional  
56  
57

1  
2  
3 helpful references, and for providing insights that are beyond those found within our thematic  
4 analysis. Additionally, we will also consult with a patient advocacy group (i.e. the empowerment  
5 council within a mental health hospital) to gather the perspective of those with lived experience.  
6  
7

## 8 **ETHICS AND DISSEMINATION**

### 9 10 **6. Consulting and translating knowledge**

11  
12 This protocol presents a scoping review that will contribute to the advancement of the topic of  
13 suicide risk assessment, focusing in on an often understudied aspect of clinical decision making  
14 within the risk assessment process. This review will identify gaps in knowledge and research,  
15 while also helping to inform best practice. This review will guide the direction of future research  
16 on the topic, and aid in improving training and education around this practice. Future research  
17 can focus on measuring the impact of each contextual factor on a clinician's assessment of  
18 suicide risk. The results from this review can contribute toward developing appropriate  
19 qualitative interview guides or aid in survey development for studying such research questions.  
20 With regards to improving training and education, the results of this review can improve  
21 clinicians' awareness of the biases that exist within the suicide risk assessment process, helping  
22 them improve on more nuanced behaviours of this practice.  
23  
24  
25

26 Approval from the Research Ethics Board is not required for this review. An integrated  
27 knowledge translation approach will be used by engaging knowledge users over the course of the  
28 study. Our team includes multiple knowledge users - two psychiatrists, a mental health nurse,  
29 and a decision maker in medical education. The team will review results and emerging themes  
30 amongst ourselves, as well as consult with an interdisciplinary suicide risk working group and  
31 patient empowerment group within a large mental health hospital. This consultation will  
32 collectively help ensure that study findings meet the needs of healthcare professionals and  
33 educators. Results will be published in appropriate peer-reviewed journals, as well as be  
34 presented at suitable academic conferences. Finally, educational materials will be created to  
35 disseminate study findings to appropriate mental health professionals.  
36  
37  
38  
39  
40  
41  
42  
43  
44  
45  
46  
47  
48  
49  
50  
51  
52  
53

## 54 **AUTHOR CONTRIBUTIONS**

1  
2  
3 The design and development of this study was led by LS, who also drafted the protocol. JS, DW,  
4 GS and VD provided guidance to the study conceptualization and protocol development and  
5 have revised all drafts of this manuscript. SB, an experienced medical librarian, developed the  
6 search strategy, conducted the search and edited the manuscript. All authors give approval to the  
7 publishing of this protocol manuscript.  
8  
9

### 10 11 **FUNDING**

12 This research received no specific grant from any funding agency in the public, commercial or  
13 not-for-profit sectors.  
14  
15

### 16 17 **COMPETING INTERESTS STATEMENT**

18 None to declare.  
19  
20  
21  
22  
23  
24  
25  
26  
27  
28  
29  
30  
31  
32  
33  
34  
35  
36  
37  
38  
39  
40  
41  
42  
43  
44  
45  
46  
47  
48  
49  
50  
51  
52  
53  
54  
55  
56  
57  
58  
59  
60

**REFERENCES:**

1. WHO. Depression (Fact sheet) 2017 [Available from: <http://www.who.int/mediacentre/factsheets/fs369/en/>].
2. Luoma JB, Martin CE, Pearson JL. Contact with mental health and primary care providers before suicide: a review of the evidence. *American Journal of Psychiatry* 2002;159(6):909-16.
3. Oquendo MA, Bernanke JA. Suicide risk assessment: tools and challenges. *World psychiatry* 2017;16(1):28-29.
4. Perlman C, Neufeld E, Martin L, et al. Suicide risk assessment inventory: A resource guide for Canadian health care organizations. *Toronto, ON: Ontario Hospital Association and Canadian Patient Safety Institute [Internet]* 2011
5. Grove WM, Zald DH, Lebow BS, et al. Clinical versus mechanical prediction: a meta-analysis. *Psychological assessment* 2000;12(1):19.
6. Franklin JC, Ribeiro JD, Fox KR, et al. Risk factors for suicidal thoughts and behaviors: A meta-analysis of 50 years of research. 2016
7. Beck AT, Steer RA, Carbin MG. Psychometric properties of the Beck Depression Inventory: Twenty-five years of evaluation. *Clinical psychology review* 1988;8(1):77-100.
8. Posner K, Brent D, Lucas C, et al. Columbia-suicide severity rating scale (C-SSRS). *New York, NY: Columbia University Medical Center* 2008
9. Cutcliffe JR, Barker P. The Nurses' Global Assessment of Suicide Risk (NGASR): developing a tool for clinical practice. *Journal of psychiatric and mental health nursing* 2004;11(4):393-400.
10. Patterson WM, Dohn HH, Bird J, et al. Evaluation of suicidal patients: the SAD PERSONS scale. *Psychosomatics* 1983;24(4):343-49.
11. Wasserman D, Rihmer Z, Rujescu D, et al. The European Psychiatric Association (EPA) guidance on suicide treatment and prevention. *European psychiatry* 2012;27(2):129-41.
12. WHO. Preventing Suicide: A global imperative. World Health Organization, 2014.
13. NICE. Self harm (longer term management). NICE Guideline (CG133). 2011
14. Bolton JM, Gunnell D, Turecki G. Suicide risk assessment and intervention in people with mental illness. *BMJ: British Medical Journal* 2015;351(8034)
15. Smyth O, McCabe C. Think and think again! Clinical decision making by advanced nurse practitioners in the Emergency Department. *International Emergency Nursing* 2017;31:72-74.
16. Kahneman D. Thinking, fast and slow: Macmillan 2011.
17. Croskerry P. The importance of cognitive errors in diagnosis and strategies to minimize them. *Academic medicine* 2003;78(8):775-80.
18. Pease JL, Forster JE, Davidson CL, et al. How Veterans Health Administration Suicide Prevention Coordinators Assess Suicide Risk. *Clinical Psychology & Psychotherapy* 2017;24(2):401-10.
19. Berman NC, Stark A, Cooperman A, et al. Effect of patient and therapist factors on suicide risk assessment. *Death studies* 2015;39(7):433-41.
20. Eriksen K, Kress VE. Beyond the DSM story: Ethical quandaries, challenges, and best practices: Sage 2004.
21. Weiland T, Cotter A, Jelinek G, et al. Suicide risk assessment in Australian emergency departments: assessing clinicians' disposition decisions. *Psychiatry journal* 2014;2014

- 1
- 2
- 3
- 4 22. Colquhoun HL, Levac D, O'Brien KK, et al. Scoping reviews: time for clarity in definition,
- 5 methods, and reporting. *Journal of clinical epidemiology* 2014;67(12):1291-94.
- 6 23. Arksey H, O'Malley L. Scoping studies: towards a methodological framework. *International*
- 7 *journal of social research methodology* 2005;8(1):19-32.
- 8 24. Levac D, Colquhoun H, O'Brien KK. Scoping studies: advancing the methodology.
- 9 *Implementation Science* 2010;5(1):69.
- 10 25. Tricco AC, Lillie E, Zarin W, et al. PRISMA Extension for Scoping Reviews (PRISMA-
- 11 ScR): Checklist and Explanation. *Annals of Internal Medicine* 2018
- 12 26. Medicine USNLo. Fact Sheet: MEDLINE, PubMed, and PMC (PubMed Central): How are
- 13 they different? [Available from: [https://](https://www.nlm.nih.gov/pubs/factsheets/dif_med_pub.html)
- 14 [www.nlm.nih.gov/pubs/factsheets/dif\\_med\\_pub.html](https://www.nlm.nih.gov/pubs/factsheets/dif_med_pub.html)
- 15 27. WHITLOCK J, MINTON R, BABINGTON P, et al. The relationship between non-suicidal
- 16 self-injury and suicide. *The Information Brief Series, Cornell Research Program on Self-*
- 17 *Injury and Recovery Cornell University, Ithaca, NY* 2015
- 18 28. Landis JR, Koch GG. The measurement of observer agreement for categorical data.
- 19 *biometrics* 1977:159-74.
- 20 29. Gillespie M, Peterson BL. Helping Novice Nurses Make Effective Clinical Decisions: The
- 21 Situated Clinical Decision-Making Framework. *Nursing education perspectives*
- 22 2009;30(3):164-70.
- 23 30. Gillespie M. Using the Situated Clinical Decision-Making framework to guide analysis of
- 24 nurses' clinical decision-making. *Nurse Education in Practice* 2010;10(6):333-40.
- 25
- 26
- 27
- 28
- 29
- 30
- 31
- 32
- 33
- 34
- 35
- 36
- 37
- 38
- 39
- 40
- 41
- 42
- 43
- 44
- 45
- 46
- 47
- 48
- 49
- 50
- 51
- 52
- 53
- 54
- 55
- 56
- 57
- 58
- 59
- 60

| Section                                                 | Item | PRISMA-ScR Checklist Item                                                                                                                                                                                                                                                                                 | Reported On                                                                                 |
|---------------------------------------------------------|------|-----------------------------------------------------------------------------------------------------------------------------------------------------------------------------------------------------------------------------------------------------------------------------------------------------------|---------------------------------------------------------------------------------------------|
| 3 Title                                                 | 1    | Identify the report as a scoping review.                                                                                                                                                                                                                                                                  | Yes                                                                                         |
| 5 Abstract                                              |      |                                                                                                                                                                                                                                                                                                           |                                                                                             |
| 7 Structured summary                                    | 2    | Provide a structured summary that includes (as applicable) background, objectives, eligibility criteria, sources of evidence, charting methods, results, and conclusions that relate to the review questions and objectives.                                                                              | Included the following sections: introduction, methods & analysis, ethics and dissemination |
| 16 Introduction                                         |      |                                                                                                                                                                                                                                                                                                           | Yes                                                                                         |
| 18 Rationale                                            | 3    | Describe the rationale for the review in the context of what is already known. Explain why the review questions/objectives lend themselves to a scoping review approach.                                                                                                                                  | Yes                                                                                         |
| 22 Objectives                                           | 4    | Provide an explicit statement of the questions and objectives being addressed with reference to their key elements (e.g. population or participants, concepts, and context) or other relevant key elements used to conceptualize the review questions and/or objectives.                                  | Yes – within methods section<br>“Identifying the research question”                         |
| 29 Methods                                              |      |                                                                                                                                                                                                                                                                                                           |                                                                                             |
| 31 Protocol and registration                            | 5    | Indicate whether a review protocol exists; state if and where it can be accessed (e.g. a Web address); and if available, provide registration information, including the registration number.                                                                                                             | This is a protocol                                                                          |
| 35 Eligibility Criteria                                 | 6    | Specify characteristics of the sources of evidence used as eligibility criteria (e.g., years considered, language, and publication status), and provide a rationale                                                                                                                                       | Yes                                                                                         |
| 39 Information sources                                  | 7    | Describe all information sources in the search (e.g., databases with dates of coverage and contact with authors to identify additional sources), as well as the date the most recent search was executed.                                                                                                 | Yes                                                                                         |
| 43 Search                                               | 8    | Present the full electronic search strategy for at least 1 database, including any limits used, such that could be repeated.                                                                                                                                                                              | Yes – Table 1                                                                               |
| 46 Selection of sources of evidence                     | 9    | State the process for selecting sources of evidence (i.e., screening and eligibility) included in the scoping review.                                                                                                                                                                                     | Yes                                                                                         |
| 49 Data charting process                                | 10   | Describe the methods of charting data from the included sources of evidence (e.g. calibrated forms or forms that have been tested by the team before their use, and whether data charting was done independently or in duplicate) and any processes for obtaining and confirming data from investigators. | Yes                                                                                         |
| 55 Data items                                           | 11   | List and define all variables for which data were sought and any assumptions and simplifications made.                                                                                                                                                                                                    | Yes – Table 2                                                                               |
| 58 Critical appraisal of individual sources of evidence | 12   | If done, provide a rationale for conducting a critical appraisal of included sources of evidence; describe the methods used and how this information was used in any data synthesis (if appropriate).                                                                                                     | Not applicable in protocol                                                                  |



|                              |    |                                                                                                                                                                                                 |                                                                                                                      |
|------------------------------|----|-------------------------------------------------------------------------------------------------------------------------------------------------------------------------------------------------|----------------------------------------------------------------------------------------------------------------------|
| Summary measures             | 13 | Not applicable for scoping reviews.                                                                                                                                                             | -                                                                                                                    |
| 1 Synthesis of results       | 14 | Describe the methods of handling and summarizing the data that were charted.                                                                                                                    | Yes                                                                                                                  |
| 2                            |    |                                                                                                                                                                                                 |                                                                                                                      |
| 3 Risk of bias across        | 15 | Not applicable for scoping reviews.                                                                                                                                                             | -                                                                                                                    |
| 4 studies                    |    |                                                                                                                                                                                                 |                                                                                                                      |
| 5                            |    |                                                                                                                                                                                                 |                                                                                                                      |
| 6 Additional analyses        | 16 | Not applicable for scoping reviews.                                                                                                                                                             | -                                                                                                                    |
| 7                            |    |                                                                                                                                                                                                 |                                                                                                                      |
| 8 <b>Results</b>             |    |                                                                                                                                                                                                 |                                                                                                                      |
| 9                            |    |                                                                                                                                                                                                 |                                                                                                                      |
| 10 Selection of sources of   | 17 | Give numbers of sources of evidence screened, assessed for eligibility, and included in the review, with reasons for exclusions at each stage, ideally using a flow diagram.                    | Not applicable in protocol                                                                                           |
| 11 evidence                  |    |                                                                                                                                                                                                 |                                                                                                                      |
| 12                           |    |                                                                                                                                                                                                 |                                                                                                                      |
| 13                           |    |                                                                                                                                                                                                 |                                                                                                                      |
| 14 Characteristics of        | 18 | For each source of evidence, present characteristics or which data were charted and provide the citations.                                                                                      | Not applicable in protocol                                                                                           |
| 15 sources of evidence       |    |                                                                                                                                                                                                 |                                                                                                                      |
| 16                           |    |                                                                                                                                                                                                 |                                                                                                                      |
| 17 Critical appraisal within | 19 | If done, present data on critical appraisal of included sources of evidence (see item 12).                                                                                                      | Not applicable in protocol                                                                                           |
| 18 sources of evidence       |    |                                                                                                                                                                                                 |                                                                                                                      |
| 19                           |    |                                                                                                                                                                                                 |                                                                                                                      |
| 20 Results of individual     | 20 | For each included source of evidence. Present the relevant data that were charted that relate to the review questions and objectives.                                                           | Not applicable in protocol                                                                                           |
| 21 sources of evidence       |    |                                                                                                                                                                                                 |                                                                                                                      |
| 22                           |    |                                                                                                                                                                                                 |                                                                                                                      |
| 23 Synthesis of results      | 21 | Summarize and/or present the charting results as they relate to the review questions and objectives                                                                                             | Not applicable in protocol                                                                                           |
| 24                           |    |                                                                                                                                                                                                 |                                                                                                                      |
| 25                           |    |                                                                                                                                                                                                 |                                                                                                                      |
| 26 Risk of bias across       | 22 | Not applicable for scoping reviews                                                                                                                                                              | -                                                                                                                    |
| 27 studies                   |    |                                                                                                                                                                                                 |                                                                                                                      |
| 28                           |    |                                                                                                                                                                                                 |                                                                                                                      |
| 29 Additional analyses       | 23 | Not applicable for scoping reviews                                                                                                                                                              | -                                                                                                                    |
| 30                           |    |                                                                                                                                                                                                 |                                                                                                                      |
| 31 <b>Discussion</b>         |    |                                                                                                                                                                                                 |                                                                                                                      |
| 32 Summary of evidence       | 24 | Summarize the main results (including an overview of concepts, themes, and types of evidence available). Link in the review questions and objectives, and consider the relevance to key groups. | Not applicable in protocol                                                                                           |
| 33                           |    |                                                                                                                                                                                                 |                                                                                                                      |
| 34                           |    |                                                                                                                                                                                                 |                                                                                                                      |
| 35                           |    |                                                                                                                                                                                                 |                                                                                                                      |
| 36 Limitations               | 25 | Discuss the limitations of the scoping review process.                                                                                                                                          | Limitations mentioned in the "Strengths and Limitations" section. Further details will be present in scoping review. |
| 37                           |    |                                                                                                                                                                                                 |                                                                                                                      |
| 38                           |    |                                                                                                                                                                                                 |                                                                                                                      |
| 39                           |    |                                                                                                                                                                                                 |                                                                                                                      |
| 40                           |    |                                                                                                                                                                                                 |                                                                                                                      |
| 41                           |    |                                                                                                                                                                                                 |                                                                                                                      |
| 42                           |    |                                                                                                                                                                                                 |                                                                                                                      |
| 43                           |    |                                                                                                                                                                                                 |                                                                                                                      |
| 44                           |    |                                                                                                                                                                                                 |                                                                                                                      |
| 45                           |    |                                                                                                                                                                                                 |                                                                                                                      |
| 46                           |    |                                                                                                                                                                                                 |                                                                                                                      |
| 47                           |    |                                                                                                                                                                                                 |                                                                                                                      |
| 48 Conclusions               | 26 | Provide a general interpretation of the results with respect to the review questions and objectives, as well as potential implications and/or next steps.                                       | Not applicable in protocol                                                                                           |
| 49                           |    |                                                                                                                                                                                                 |                                                                                                                      |
| 50                           |    |                                                                                                                                                                                                 |                                                                                                                      |
| 51                           |    |                                                                                                                                                                                                 |                                                                                                                      |
| 52 Funding                   | 27 | Describe sources of funding for the included sources of evidence, as well as sources of funding for the scoping review. Describe the role of the funders of the scoping review.                 | Yes                                                                                                                  |
| 53                           |    |                                                                                                                                                                                                 |                                                                                                                      |
| 54                           |    |                                                                                                                                                                                                 |                                                                                                                      |
| 55                           |    |                                                                                                                                                                                                 |                                                                                                                      |
| 56                           |    |                                                                                                                                                                                                 |                                                                                                                      |
| 57                           |    |                                                                                                                                                                                                 |                                                                                                                      |
| 58                           |    |                                                                                                                                                                                                 |                                                                                                                      |
| 59                           |    |                                                                                                                                                                                                 |                                                                                                                      |
| 60                           |    |                                                                                                                                                                                                 |                                                                                                                      |
